# Supplementary material for: An Antibody Targeting ICOS Increases Intratumoral Cytotoxic to Regulatory T-cell Ratio and Induces Tumor Regression
Source: Oxford University Press journal article supplement (doi:10.1158/2326-6066.cir-20-0034), 2020-09-30
Supplement: 23266066cir200034-sup-235586_3_supp_6524908_qfntnk.xlsx [file 23266066cir200034-sup-235586_3_supp_6524908_qfntnk.xlsx]

## Sheet: Sheet1
Donor ID	age at case start	gender	weight [kg]	body height [cm]	body mass index	disease code	description	since	primary or relapse tumor	tumor size [cm]	organ	histological type	stage	radicality	grading	dignity	morphology no	morphology
D0428	64	f	57	147	26.4	C34.3	malignant neoplasm of bronchus and lung: lower lobe, bronchus or lung	10.2017	primary tumor	4.6	lung	adenocarcinoma with acinar type	IIA	R0	G2	malign	M8551/3	acinar cell cystadenocarcinoma
D0429	68	f	86	170	29.8	C34.1	malignant neoplasm of bronchus and lung: upper lobe, bronchus or lung	10.2017	primary tumor	3.2	lung	adenocarcinoma with acinar type	IB	R0	G2	malign	M8550/3	acinar cell carcinoma
D0430	75	f	60	166	21.8	C34.1	malignant neoplasm of bronchus and lung: upper lobe, bronchus or lung	11.2017	primary tumor	3.9	lung	adenocarcinoma	IB	R0	G2	malign	M8140/3	adenocarcinoma, NOS
D0431	79	m	108	170	37.4	C34.1	malignant neoplasm of bronchus and lung: upper lobe, bronchus or lung	11.2017	primary tumor	4.7	lung	squamous cell carcinoma	IIA	R0	G3	malign	M8070/3	squamous cell carcinoma, NOS
D0432	69	m	92	182	27.8	C34.1	malignant neoplasm of bronchus and lung: upper lobe, bronchus or lung	10.2017	primary tumor	2.6	lung	adenocarcinoma with acinar type	III A	R0	G3	malign	M8140/3	adenocarcinoma, NOS
